# Supplementary material for: Instrumental Role of Helicobacter pylori γ-Glutamyl Transpeptidase in VacA-Dependent Vacuolation in Gastric Epithelial Cells
Source: PLOS journal article supplement (doi:10.1371/journal.pone.0131460), 2015-06-25
Supplement: S2 (10.1371/journal.pone.0131460.s002) [file journal.pone.0131460.s002]

(A)

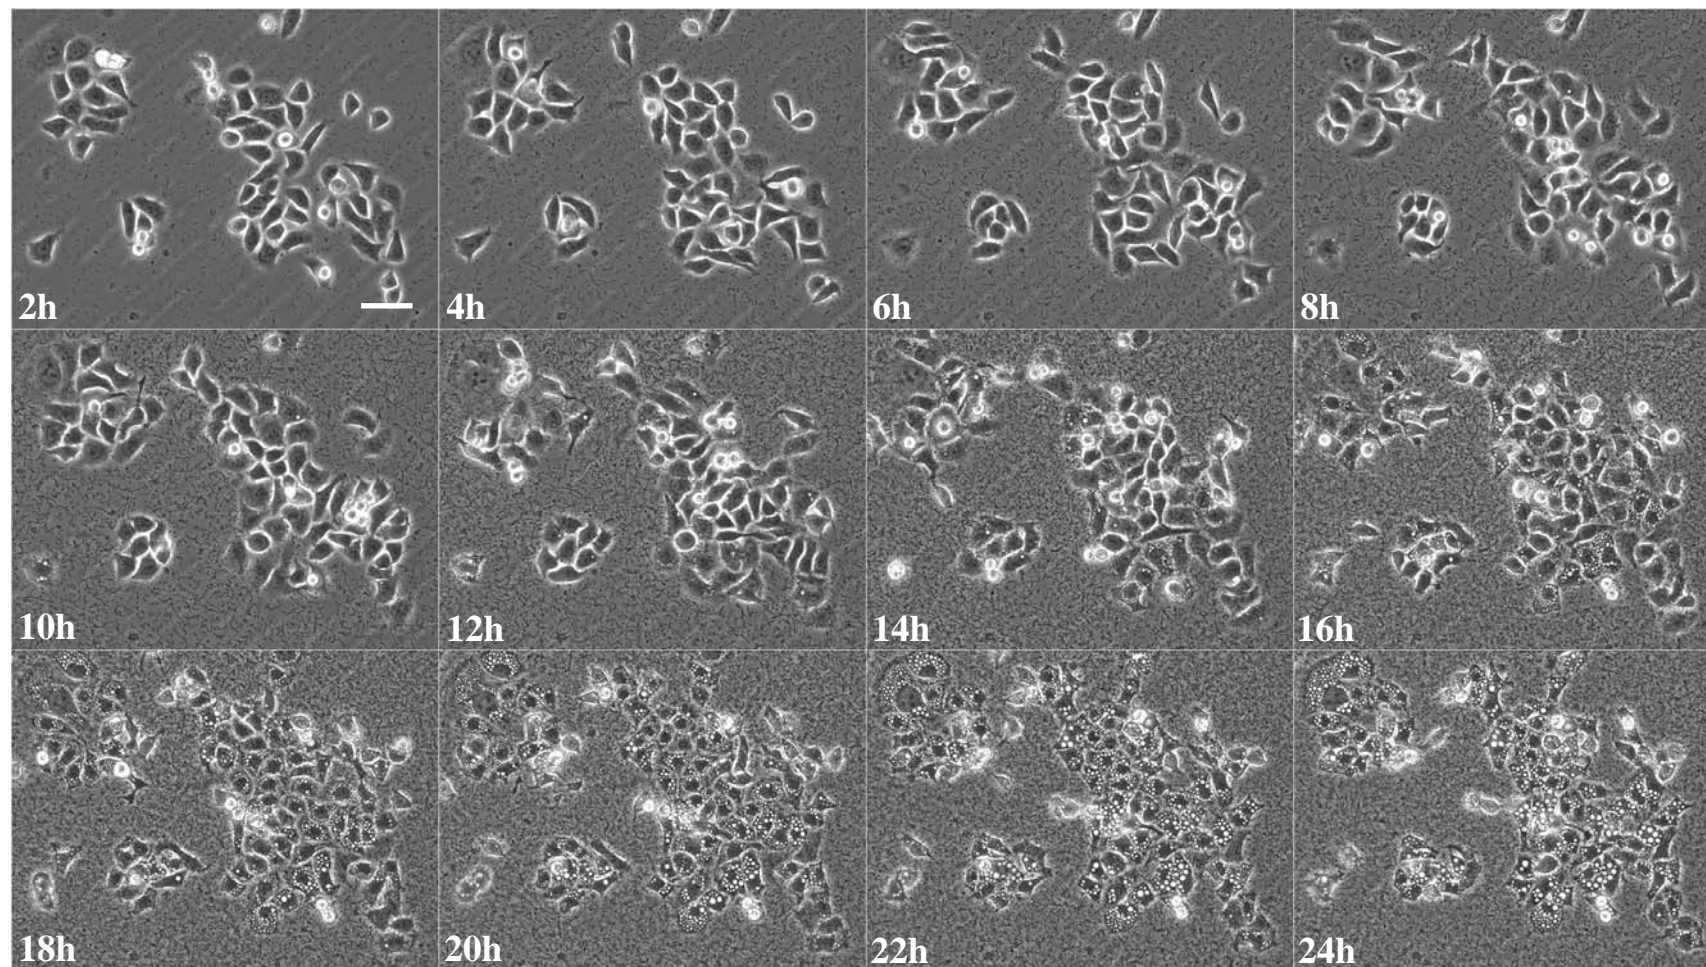

(B)

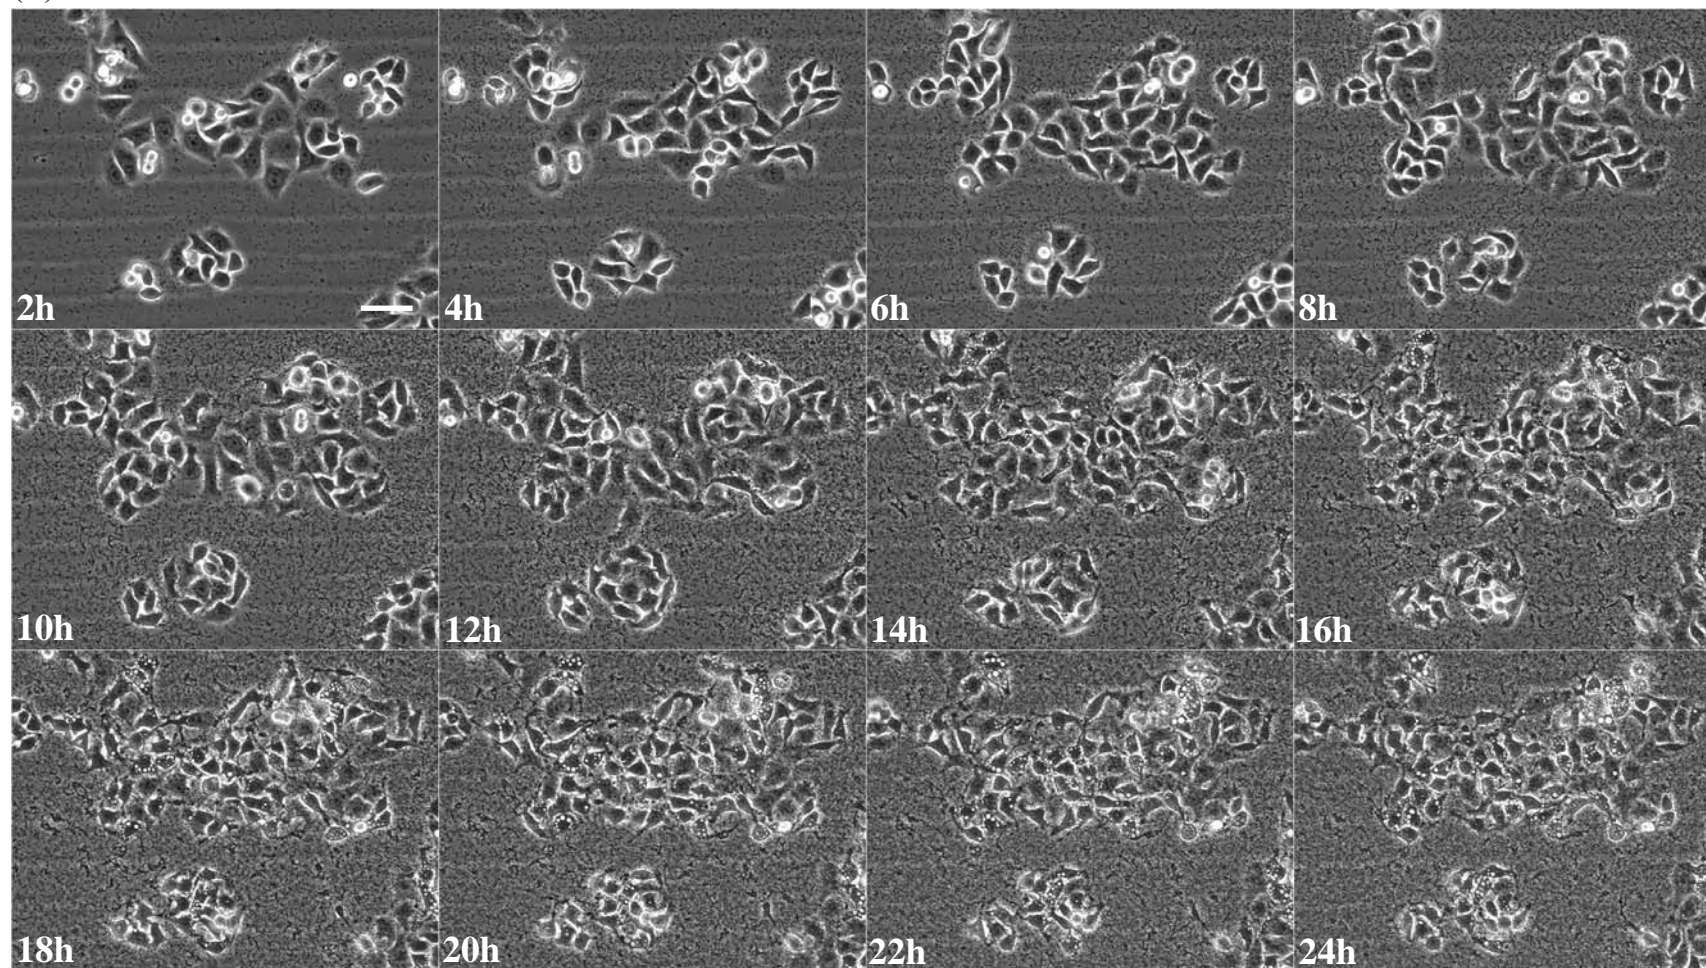

(C)

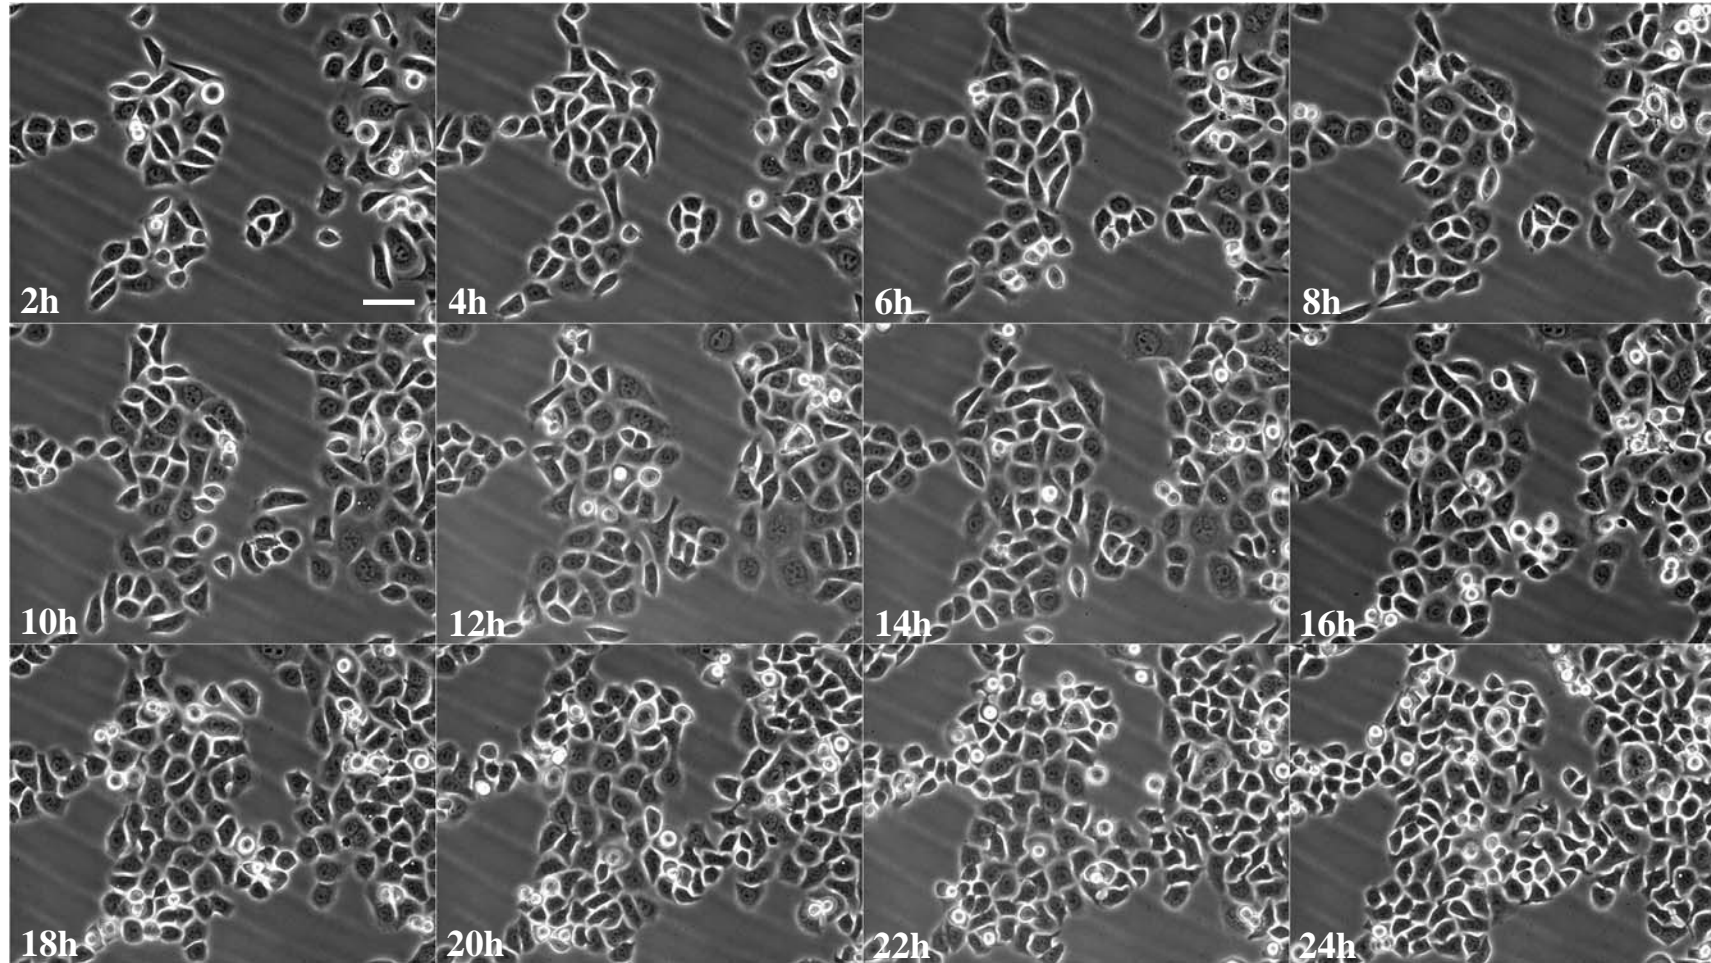

**S2 Figure. Time-lapse micrographs of *H. pylori*-infected AGS cells.** AGS cells were infected with (A) *H. pylori* WT or (B)  $\Delta$ ggt at MOI of 1:100 over a 24 hour period. (C) Uninfected cells served as control. Time-lapse micrographs are shown at 2 hourly intervals. Time from the start of infection is indicated in white. Scale bar represents 50  $\mu$ m. (See S1, S2 and S3 Videos respectively for the full time course).
